# Supplementary material for: Interrogation of CYP2D6 Structural Variant Alleles Improves the Correlation Between CYP2D6 Genotype and CYP2D6‐Mediated Metabolic Activity
Source: PubMed Central journal article supplement — Clin Transl Sci. 2019 Oct 25;13(1):147–56. doi: 10.1111/cts.12695 (PMC6951848; doi:10.1111/cts.12695), 2019-10-25

**Figure S2. Functional characterization of rare *CYP2D6* coding variants with CYP2D6 probe**

**Vivid™ 7-ethoxymethoxy-3-cyanocoumarin.** Each *CYP2D6* variant was expressed in an isogenic yeast strain and function was characterized with a standard fluorogenic CYP2D6 substrate. Controls (light gray): inactive variant (C443H) and decreased function variant (P34S). Wildtype CYP2D6 protein (medium gray). Rare coding variant strains (dark gray): P8S, D198N, P267L, A449D, and R474Q. Error bars indicate standard deviations from 4 independent replicates.

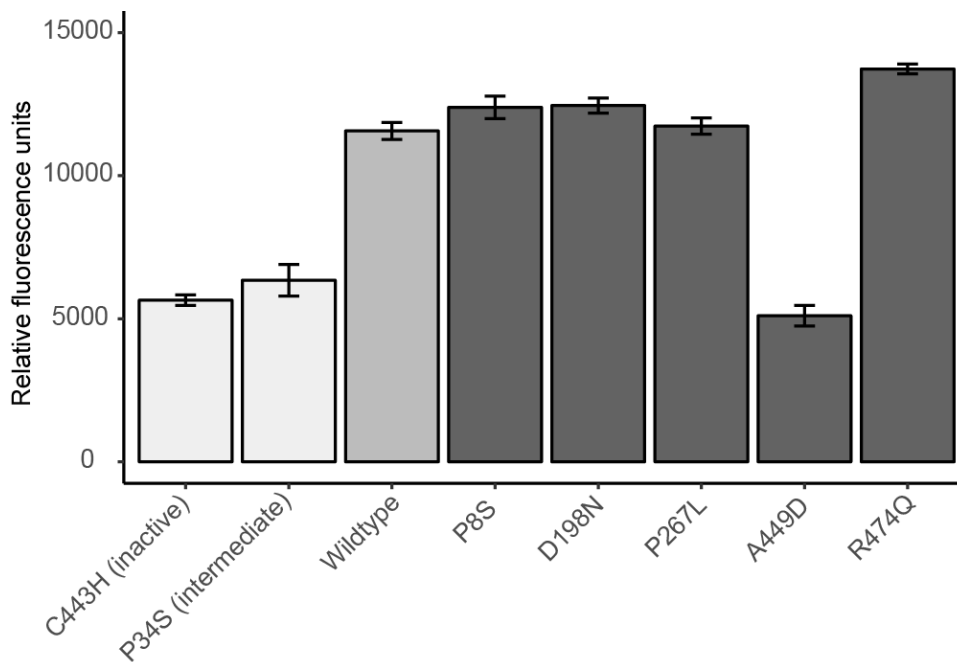

Supplement: CTS-13-147-s002.pdf [file CTS-13-147-s002.pdf]
