# Supplementary material for: Interrogation of CYP2D6 Structural Variant Alleles Improves the Correlation Between CYP2D6 Genotype and CYP2D6‐Mediated Metabolic Activity
Source: PubMed Central journal article supplement — Clin Transl Sci. 2019 Oct 25;13(1):147–56. doi: 10.1111/cts.12695 (PMC6951848; doi:10.1111/cts.12695), 2019-10-25

**Figure S3. Protein modeling of CYP2D6 wildtype and CYP2D6 with the rare A449D variant.**

SWISS-MODEL was used to render CYP2D6 structure, with and without the A449D rare variant. The rendered visuals suggest that A449D affects CYP2D6 activity by interfering with heme binding. The A449D amino acid change also has a CADD score of 32, which is considerably higher than the score of 15 that is used as cut-off for determining detrimental variants.

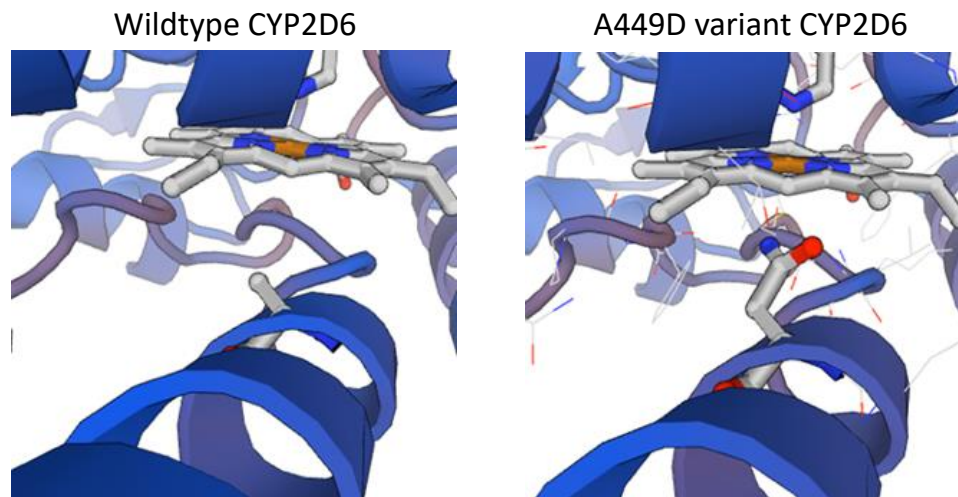

Supplement: CTS-13-147-s003.pdf [file CTS-13-147-s003.pdf]
