# Supplementary material for: Interrogation of CYP2D6 Structural Variant Alleles Improves the Correlation Between CYP2D6 Genotype and CYP2D6‐Mediated Metabolic Activity
Source: PubMed Central journal article supplement — Clin Transl Sci. 2019 Oct 25;13(1):147–56. doi: 10.1111/cts.12695 (PMC6951848; doi:10.1111/cts.12695), 2019-10-25
Supplement: CTS-13-147-s004.pdf [file CTS-13-147-s004.pdf]

**Table S1. Liver donor demographics (n = 314)**

---

|                              |                 |
|------------------------------|-----------------|
| <b>Age (years)*</b>          |                 |
| Mean $\pm$ SD                | 39.7 $\pm$ 22.4 |
| Range                        | 0 - 87          |
| <b>Sex (n, %)</b>            |                 |
| Male                         | 183 (58.2%)     |
| Female                       | 126 (40.1%)     |
| Unknown                      | 5 (1.6%)        |
| <b>Race/ethnicity (n, %)</b> |                 |
| European                     | 300 (95.5%)     |
| African                      | 9 (2.9%)        |
| Asian                        | 1 (0.3%)        |
| Hispanic                     | 1 (0.3%)        |
| Unknown                      | 3 (1.0%)        |

---

\* Age was recorded in years for all subjects and an age of zero was given to donors under one year old; more granular data (e.g. weeks, months) were not available.
