# Supplementary material for: Interrogation of CYP2D6 Structural Variant Alleles Improves the Correlation Between CYP2D6 Genotype and CYP2D6‐Mediated Metabolic Activity
Source: PubMed Central journal article supplement — Clin Transl Sci. 2019 Oct 25;13(1):147–56. doi: 10.1111/cts.12695 (PMC6951848; doi:10.1111/cts.12695), 2019-10-25
Supplement: CTS-13-147-s006.pdf [file CTS-13-147-s006.pdf]

**Table S3. SNVs/indels detected by PGRNseq data that were within 3 kb from either end of *CYP2D6***

| No. | Position* | rs ID        | Reference Allele          | Alternative Allele                      | Function**         | Amino Acids | Protein Position | CADD Score | Allele Count | Within Haplotype Definition Region*** | In Translation Table**** |
|-----|-----------|--------------|---------------------------|-----------------------------------------|--------------------|-------------|------------------|------------|--------------|---------------------------------------|--------------------------|
| 1   | 42521442  | rs535293691  | G                         | A                                       | Downstream-gene    | -           | -                | 4.086      | 2            | No                                    | No                       |
| 2   | 42521489  | rs145458535  | C                         | T                                       | Downstream-gene    | -           | -                | 1.976      | 79           | No                                    | No                       |
| 3   | 42521577  | rs201551607  | G                         | A                                       | Downstream-gene    | -           | -                | 0.172      | 2            | No                                    | No                       |
| 4   | 42521625  | rs72395204   | GGGGTGGGGAA<br>GGGTGGGGAA | G                                       | Downstream-gene    | -           | -                | -          | 52           | No                                    | No                       |
| 5   | 42521625  | rs72395204   | GGGGTGGGGAA<br>GGGTGGGGAA | GGGGTGGGGAA                             | Downstream-gene    | -           | -                | -          | 98           | No                                    | No                       |
| 6   | 42521625  | rs72395204   | GGGGTGGGGAA<br>GGGTGGGGAA | GGGGTGGGGAA<br>GGGTGGGGAA<br>GGGTGGGGAA | Downstream-gene    | -           | -                | -          | 7            | No                                    | No                       |
| 7   | 42521676  | -            | G                         | A                                       | Downstream-gene    | -           | -                | 0.257      | 1            | No                                    | No                       |
| 8   | 42521799  | -            | GGCCTGTGGGCCCT            | G                                       | Downstream-gene    | -           | -                | -          | 1            | No                                    | No                       |
| 9   | 42521807  | rs561101513  | G                         | T                                       | Downstream-gene    | -           | -                | 2.048      | 1            | No                                    | No                       |
| 10  | 42521811  | -            | C                         | G                                       | Downstream-gene    | -           | -                | 4.42       | 1            | No                                    | No                       |
| 11  | 42521865  | rs112866416  | C                         | T                                       | Downstream-gene    | -           | -                | 2.139      | 4            | No                                    | No                       |
| 12  | 42521918  | rs532182046  | T                         | C                                       | Downstream-gene    | -           | -                | 3.416      | 6            | No                                    | No                       |
| 13  | 42521919  | rs550576546  | G                         | A                                       | Downstream-gene    | -           | -                | 7.514      | 6            | No                                    | No                       |
| 14  | 42521920  | rs562602203  | T                         | G                                       | Downstream-gene    | -           | -                | 5.554      | 5            | No                                    | No                       |
| 15  | 42521929  | rs34385013   | G                         | A                                       | Downstream-gene    | -           | -                | 2.417      | 261          | No                                    | No                       |
| 16  | 42521969  | -            | G                         | A                                       | Downstream-gene    | -           | -                | 3.234      | 1            | No                                    | No                       |
| 17  | 42521985  | rs4078247    | T                         | C                                       | Downstream-gene    | -           | -                | 0.999      | 145          | No                                    | No                       |
| 18  | 42522027  | rs4078248    | C                         | T                                       | Downstream-gene    | -           | -                | 8.703      | 4            | No                                    | No                       |
| 19  | 42522074  | rs35028622   | C                         | A                                       | Downstream-gene    | -           | -                | 1.735      | 259          | No                                    | Yes                      |
| 20  | 42522079  | rs77827855   | G                         | A                                       | Downstream-gene    | -           | -                | 0.286      | 2            | No                                    | No                       |
| 21  | 42522084  | rs4078249    | C                         | T                                       | Downstream-gene    | -           | -                | 3.795      | 4            | No                                    | No                       |
| 22  | 42522101  | rs866408541  | C                         | T                                       | Downstream-gene    | -           | -                | 5.332      | 1            | No                                    | No                       |
| 23  | 42522137  | rs71184866   | C                         | CTGT                                    | Downstream-gene    | -           | -                | -          | 405          | No                                    | No                       |
| 24  | 42522141  | -            | G                         | T                                       | Downstream-gene    | -           | -                | 3.167      | 2            | No                                    | No                       |
| 25  | 42522142  | -            | A                         | G                                       | Downstream-gene    | -           | -                | 3.045      | 2            | No                                    | No                       |
| 26  | 42522312  | rs116390392  | T                         | C                                       | Downstream-gene    | -           | -                | 2.511      | 413          | Yes                                   | Yes                      |
| 27  | 42522349  | rs148648640  | T                         | C                                       | Downstream-gene    | -           | -                | 0.894      | 1            | Yes                                   | Yes                      |
| 28  | 42522392  | rs28371738   | G                         | A                                       | Downstream-gene    | -           | -                | 1.136      | 145          | Yes                                   | Yes                      |
| 29  | 42522464  | rs77845838   | G                         | A                                       | Downstream-gene    | -           | -                | 5.327      | 7            | Yes                                   | Yes                      |
| 30  | 42522550  | rs201759814  | G                         | A                                       | 3-prime-UTR        | -           | -                | 4.413      | 41           | Yes                                   | Yes                      |
| 31  | 42522613  | rs1135840    | G                         | C                                       | Missense           | THR,SER     | 486/498          | 3.127      | 261          | Yes                                   | Yes                      |
| 32† | 42522649  | rs141756339  | C                         | T                                       | Missense           | ARG,GLN     | 474/498          | 11.57      | 1            | Yes                                   | No                       |
| 33‡ | 42522724  | rs79392742   | G                         | T                                       | Missense           | ALA,ASP     | 449/498          | 32         | 1            | Yes                                   | No                       |
| 34  | 42522765  | rs548264542  | G                         | T                                       | Intron             | -           | -                | 6.939      | 1            | Yes                                   | No                       |
| 35  | 42522774  | rs772203297  | G                         | A                                       | Intron             | -           | -                | 1.665      | 3            | Yes                                   | No                       |
| 36  | 42522846  | -            | C                         | T                                       | Intron-near-splice | -           | -                | 5.595      | 1            | Yes                                   | No                       |
| 37  | 42522940  | rs769157652  | C                         | T                                       | Missense           | GLU,LYS     | 410/498          | 15.05      | 1            | Yes                                   | Yes                      |
| 38  | 42522965  | rs28371732   | C                         | T                                       | Synonymous         | SER         | 401/498          | 0.891      | 2            | Yes                                   | Yes                      |
| 39  | 42523003  | rs116917064  | A                         | G                                       | Intron             | -           | -                | 3.767      | 368          | Yes                                   | Yes                      |
| 40  | 42523070  | rs1009883497 | GAC                       | G                                       | Intron             | -           | -                | -          | 1            | Yes                                   | No                       |

|    |          |              |      |    |                      |         |         |       |     |     |     |
|----|----------|--------------|------|----|----------------------|---------|---------|-------|-----|-----|-----|
| 41 | 42523209 | rs28371730   | T    | C  | Intron               | -       | -       | 1.232 | 408 | Yes | Yes |
| 42 | 42523211 | rs2004511    | T    | C  | Intron               | -       | -       | 0.848 | 146 | Yes | Yes |
| 43 | 42523228 | -            | C    | T  | Intron               | -       | -       | 1.957 | 1   | Yes | No  |
| 44 | 42523247 | rs1269631565 | C    | CT | Intron               | -       | -       | -     | 1   | Yes | Yes |
| 45 | 42523309 | rs867985262  | C    | T  | Intron               | -       | -       | 3.3   | 120 | Yes | Yes |
| 46 | 42523315 | rs79596243   | T    | C  | Intron               | -       | -       | 2.375 | 126 | Yes | Yes |
| 47 | 42523358 | rs28371729   | G    | T  | Intron               | -       | -       | 5.316 | 17  | Yes | Yes |
| 48 | 42523400 | rs28578778   | A    | G  | Intron               | -       | -       | 0.507 | 7   | Yes | Yes |
| 49 | 42523409 | rs1985842    | G    | T  | Intron               | -       | -       | 0.698 | 201 | Yes | Yes |
| 50 | 42523505 | rs150552908  | C    | T  | Missense             | GLY,SER | 373/498 | 11.82 | 68  | Yes | Yes |
| 51 | 42523514 | rs61745683   | C    | T  | Missense             | VAL,ILE | 370/498 | 6.769 | 65  | Yes | Yes |
| 52 | 42523528 | rs1058172    | C    | T  | Missense             | ARG,HIS | 365/498 | 34    | 124 | Yes | Yes |
| 53 | 42523539 | rs28371726   | A    | G  | Synonymous           | HIS     | 361/498 | 7.593 | 36  | Yes | Yes |
| 54 | 42523558 | rs202102799  | T    | C  | Missense             | TYR,CYS | 355/498 | 15.61 | 19  | Yes | Yes |
| 55 | 42523567 | rs61736517   | T    | C  | Missense             | HIS,ARG | 352/498 | 0.008 | 1   | Yes | Yes |
| 56 | 42523609 | rs771811053  | ACGT | A  | Coding               | -       | -       | -     | 1   | Yes | No  |
| 57 | 42523610 | rs59421388   | C    | T  | Missense             | VAL,MET | 338/498 | 22.9  | 1   | Yes | Yes |
| 58 | 42523636 | rs3915951    | C    | A  | Missense-near-splice | ARG,LEU | 329/498 | 14.89 | 63  | Yes | No  |
| 59 | 42523650 | rs370010370  | C    | T  | Intron               | -       | -       | 4.449 | 1   | Yes | No  |
| 60 | 42523695 | rs768806497  | CCTT | C  | Intron               | -       | -       | -     | 1   | Yes | No  |
| 61 | 42523721 | rs867265808  | G    | A  | Intron               | -       | -       | 7.023 | 1   | Yes | Yes |
| 62 | 42523805 | rs28371725   | C    | T  | Intron               | -       | -       | 6.324 | 75  | Yes | Yes |
| 63 | 42523813 | rs143276168  | G    | A  | Intron               | -       | -       | 1.046 | 2   | Yes | Yes |
| 64 | 42523820 | rs772490933  | G    | A  | Intron               | -       | -       | 5.597 | 1   | Yes | No  |
| 65 | 42523854 | rs79292917   | C    | T  | Synonymous           | PRO     | 325/498 | 4.125 | 5   | Yes | Yes |
| 66 | 42523943 | rs16947      | A    | G  | Missense             | CYS,ARG | 296/498 | 0.545 | 406 | Yes | Yes |
| 67 | 42524073 | rs187203531  | C    | G  | Intron               | -       | -       | 3.596 | 7   | Yes | No  |
| 68 | 42524130 | rs28371722   | C    | T  | Intron               | -       | -       | 2.929 | 1   | Yes | No  |
| 69 | 42524132 | rs76015180   | C    | T  | Intron               | -       | -       | 6.039 | 2   | Yes | Yes |
| 70 | 42524175 | rs5030656    | CCTT | C  | Coding-near-splice   | -       | -       | -     | 22  | Yes | Yes |
| 71 | 42524191 | rs28371719   | C    | A  | Synonymous           | LEU     | 276/498 | 5.956 | 1   | Yes | Yes |
| 72 | 42524218 | rs28371718   | G    | T  | Synonymous           | PRO     | 267/498 | 4.991 | 3   | Yes | Yes |
| 73 | 42524219 | rs148769737  | G    | A  | Missense             | PRO,LEU | 267/498 | 15.39 | 1   | Yes | No  |
| 74 | 42524243 | rs35742686   | CT   | C  | Frameshift           | -       | -       | -     | 8   | Yes | Yes |
| 75 | 42524310 | rs28371717   | C    | A  | Missense             | ALA,SER | 237/498 | 11.43 | 5   | Yes | Yes |
| 76 | 42524323 | rs17002852   | A    | G  | Synonymous           | HIS     | 232/498 | 4.784 | 4   | Yes | Yes |
| 77 | 42524501 | rs75203276   | C    | T  | Intron               | -       | -       | 1.877 | 1   | Yes | Yes |
| 78 | 42524502 | rs267608300  | C    | T  | Intron               | -       | -       | 1.687 | 5   | Yes | Yes |
| 79 | 42524578 | rs80262685   | T    | C  | Intron               | -       | -       | 1.351 | 1   | Yes | Yes |
| 80 | 42524670 | rs76327133   | G    | A  | Intron               | -       | -       | 2.853 | 1   | Yes | Yes |
| 81 | 42524696 | rs58440431   | T    | C  | Intron               | -       | -       | 5.504 | 142 | Yes | Yes |
| 82 | 42524708 | rs111564371  | T    | C  | Intron               | -       | -       | 1.56  | 208 | Yes | No  |
| 83 | 42524713 | rs112568578  | C    | A  | Intron               | -       | -       | 0.492 | 1   | Yes | No  |
| 84 | 42524713 | rs112568578  | C    | G  | Intron               | -       | -       | 0.492 | 207 | Yes | No  |
| 85 | 42524733 | -            | G    | A  | Intron               | -       | -       | 2.875 | 2   | Yes | No  |
| 86 | 42524743 | rs113889384  | G    | A  | Intron               | -       | -       | 1.308 | 199 | Yes | No  |
| 87 | 42524759 | -            | G    | C  | Intron               | -       | -       | 0.675 | 1   | Yes | No  |
| 88 | 42524776 | rs368129875  | C    | T  | Intron               | -       | -       | 1.347 | 1   | Yes | No  |
| 89 | 42524795 | rs28371713   | A    | G  | Synonymous           | PHE     | 219/498 | 4.015 | 210 | Yes | No  |
| 90 | 42524814 | rs199535154  | A    | G  | Missense             | LEU,PRO | 213/498 | 14.3  | 3   | Yes | Yes |
| 91 | 42524815 | rs150163869  | G    | A  | Synonymous           | LEU     | 213/498 | 3.7   | 4   | Yes | Yes |

|     |          |              |    |    |                    |         |         |       |     |     |     |
|-----|----------|--------------|----|----|--------------------|---------|---------|-------|-----|-----|-----|
| 92  | 42524817 | rs5030866    | C  | T  | Missense           | GLY,GLU | 212/498 | 3.567 | 6   | Yes | Yes |
| 93  | 42524820 | rs3831704    | T  | TC | Frameshift         | -       | -       | -     | 3   | Yes | Yes |
| 94  | 42524860 | rs763284150  | C  | T  | Missense           | ASP,ASN | 198/498 | 8.097 | 1   | Yes | No  |
| 95  | 42524924 | rs111606937  | A  | G  | Synonymous         | GLY     | 176/498 | 6.286 | 126 | Yes | Yes |
| 96  | 42524947 | rs3892097    | C  | T  | Splice-acceptor    | -       | -       | 14.92 | 126 | Yes | Yes |
| 97  | 42524975 | rs200720666  | C  | T  | Intron             | -       | -       | 6.896 | 2   | Yes | No  |
| 98  | 42525038 | rs1135826    | A  | C  | Missense           | SER,ALA | 168/498 | 0.028 | 1   | Yes | Yes |
| 99  | 42525039 | rs1135825    | G  | T  | Missense           | HIS,GLN | 167/498 | 0.021 | 1   | Yes | Yes |
| 100 | 42525044 | rs1135824    | T  | C  | Missense           | ASN,ASP | 166/498 | 0.003 | 1   | Yes | Yes |
| 101 | 42525045 | rs768668762  | G  | A  | Synonymous         | ALA     | 165/498 | 0.032 | 1   | Yes | Yes |
| 102 | 42525085 | rs5030655    | CA | C  | Frameshift         | -       | -       | -     | 6   | Yes | Yes |
| 103 | 42525089 | rs78482768   | G  | C  | Missense           | GLN,GLU | 151/498 | 0.009 | 1   | Yes | Yes |
| 104 | 42525132 | rs1058164    | G  | C  | Synonymous         | VAL     | 136/498 | 0.087 | 261 | Yes | Yes |
| 105 | 42525134 | rs61736512   | C  | T  | Missense           | VAL,ILE | 136/498 | 7.841 | 1   | Yes | Yes |
| 106 | 42525180 | rs61736507   | G  | A  | Synonymous         | PHE     | 120/498 | 4.546 | 3   | Yes | Yes |
| 107 | 42525305 | rs142302759  | T  | G  | Intron             | -       | -       | 2.797 | 1   | Yes | No  |
| 108 | 42525390 | rs557722765  | G  | A  | Intron             | -       | -       | 6.221 | 2   | Yes | Yes |
| 109 | 42525416 | rs143170489  | G  | C  | Intron             | -       | -       | 0.508 | 3   | Yes | No  |
| 110 | 42525438 | rs184086520  | A  | C  | Intron             | -       | -       | 4.17  | 1   | Yes | No  |
| 111 | 42525463 | rs1046791114 | G  | A  | Intron             | -       | -       | 1.17  | 3   | Yes | No  |
| 112 | 42525500 | rs189736703  | C  | T  | Intron             | -       | -       | 1.057 | 5   | Yes | No  |
| 113 | 42525547 | rs267608277  | G  | A  | Intron             | -       | -       | 4.796 | 5   | Yes | Yes |
| 114 | 42525625 | rs1081004    | C  | T  | Intron             | -       | -       | 4.952 | 34  | Yes | Yes |
| 115 | 42525628 | -            | T  | A  | Intron             | -       | -       | 4.379 | 1   | Yes | No  |
| 116 | 42525728 | rs78854695   | A  | C  | Intron             | -       | -       | 5.434 | 1   | Yes | Yes |
| 117 | 42525733 | rs267608289  | T  | C  | Intron-near-splice | -       | -       | 3.956 | 1   | Yes | Yes |
| 118 | 42525756 | rs1081003    | G  | A  | Synonymous         | PHE     | 112/498 | 3.186 | 25  | Yes | Yes |
| 119 | 42525772 | rs28371706   | G  | A  | Missense           | THR,ILE | 107/498 | 5.817 | 4   | Yes | Yes |
| 120 | 42525798 | rs28371705   | G  | C  | Synonymous         | THR     | 98/498  | 3.782 | 119 | Yes | Yes |
| 121 | 42525811 | rs28371704   | T  | C  | Missense           | HIS,ARG | 94/498  | 0.424 | 115 | Yes | Yes |
| 122 | 42525821 | rs28371703   | G  | T  | Missense           | LEU,MET | 91/498  | 14.36 | 115 | Yes | Yes |
| 123 | 42525952 | rs71328650   | C  | A  | Intron             | -       | -       | 2.593 | 259 | Yes | Yes |
| 124 | 42526049 | rs147296446  | C  | G  | Intron             | -       | -       | 3.125 | 275 | Yes | Yes |
| 125 | 42526421 | rs926658668  | A  | G  | Intron             | -       | -       | 3.423 | 1   | Yes | No  |
| 126 | 42526477 | rs34291018   | T  | C  | Intron             | -       | -       | 4.764 | 1   | Yes | Yes |
| 127 | 42526484 | rs28371699   | A  | C  | Intron             | -       | -       | 6.725 | 258 | Yes | Yes |
| 128 | 42526524 | rs76527171   | G  | A  | Intron             | -       | -       | 6.971 | 24  | Yes | Yes |
| 129 | 42526549 | rs56011157   | C  | T  | Intron             | -       | -       | 6.694 | 408 | Yes | Yes |
| 130 | 42526561 | rs28695233   | G  | T  | Intron             | -       | -       | 2.422 | 407 | Yes | Yes |
| 131 | 42526562 | rs75276289   | G  | C  | Intron             | -       | -       | 1.702 | 407 | Yes | Yes |
| 132 | 42526567 | rs1080998    | G  | A  | Intron             | -       | -       | 0.469 | 407 | Yes | Yes |
| 133 | 42526571 | rs1080997    | C  | G  | Intron             | -       | -       | 1.522 | 407 | Yes | Yes |
| 134 | 42526573 | rs1080996    | T  | G  | Intron             | -       | -       | 2.388 | 407 | Yes | Yes |
| 135 | 42526580 | rs1080995    | G  | C  | Intron             | -       | -       | 3.908 | 407 | Yes | Yes |
| 136 | 42526694 | rs1065852    | G  | A  | Missense           | PRO,SER | 34/498  | 18.34 | 145 | Yes | Yes |
| 137 | 42526717 | rs28371696   | C  | T  | Missense           | ARG,HIS | 26/498  | 14.41 | 2   | Yes | Yes |
| 138 | 42526763 | rs769258     | C  | T  | Missense           | VAL,MET | 11/498  | 3.418 | 39  | Yes | Yes |
| 139 | 42526772 | rs1346961531 | G  | A  | Missense           | PRO,SER | 8/498   | 1.759 | 1   | Yes | No  |
| 140 | 42526775 | rs72549358   | C  | T  | Missense           | VAL,MET | 7/498   | 1.817 | 1   | Yes | Yes |
| 141 | 42526811 | rs376446555  | AT | A  | 5-prime-UTR        | -       | -       | -     | 3   | Yes | No  |
| 142 | 42526816 | rs756687222  | C  | G  | 5-prime-UTR        | -       | -       | 5.87  | 3   | Yes | No  |

|     |          |             |    |    |               |   |   |       |     |     |     |
|-----|----------|-------------|----|----|---------------|---|---|-------|-----|-----|-----|
| 143 | 42526836 | rs75085559  | A  | AC | 5-prime-UTR   | - | - | -     | 5   | Yes | Yes |
| 144 | 42526969 | rs1080993   | C  | T  | Upstream-gene | - | - | 4.618 | 1   | Yes | Yes |
| 145 | 42527109 | -           | C  | T  | Upstream-gene | - | - | 3.693 | 1   | Yes | No  |
| 146 | 42527116 | rs572914357 | A  | G  | Upstream-gene | - | - | 2.938 | 2   | Yes | No  |
| 147 | 42527158 | rs1080992   | C  | T  | Upstream-gene | - | - | 2.402 | 4   | Yes | Yes |
| 148 | 42527191 | rs374672076 | C  | G  | Upstream-gene | - | - | 1.49  | 116 | Yes | No  |
| 149 | 42527224 | rs566383351 | G  | A  | Upstream-gene | - | - | 1.184 | 1   | Yes | Yes |
| 150 | 42527381 | rs769257    | C  | T  | Upstream-gene | - | - | 0.566 | 1   | Yes | Yes |
| 151 | 42527471 | rs28633410  | T  | C  | Upstream-gene | - | - | 0.843 | 401 | Yes | Yes |
| 152 | 42527530 | -           | T  | C  | Upstream-gene | - | - | 0.539 | 1   | Yes | No  |
| 153 | 42527533 | rs28624811  | A  | G  | Upstream-gene | - | - | 0.79  | 405 | Yes | Yes |
| 154 | 42527580 | rs949806652 | C  | T  | Upstream-gene | - | - | 4.046 | 1   | Yes | No  |
| 155 | 42527684 | rs114155186 | C  | A  | Upstream-gene | - | - | 0.902 | 1   | Yes | No  |
| 156 | 42527741 | rs200937699 | G  | T  | Upstream-gene | - | - | 0.61  | 1   | Yes | No  |
| 157 | 42527793 | rs1080989   | C  | T  | Upstream-gene | - | - | 0.265 | 145 | Yes | Yes |
| 158 | 42527886 | rs375413467 | A  | AT | Upstream-gene | - | - | -     | 62  | Yes | Yes |
| 159 | 42527929 | rs528127834 | C  | A  | Upstream-gene | - | - | 0.791 | 2   | Yes | No  |
| 160 | 42527989 | rs757622584 | TC | T  | Upstream-gene | - | - | -     | 1   | Yes | No  |
| 161 | 42528028 | rs28735595  | C  | T  | Upstream-gene | - | - | 0.256 | 164 | Yes | Yes |
| 162 | 42528096 | rs59099247  | C  | T  | Upstream-gene | - | - | 0.489 | 1   | Yes | Yes |
| 163 | 42528224 | rs28588594  | G  | A  | Upstream-gene | - | - | 0.835 | 41  | Yes | Yes |
| 164 | 42528382 | rs1080985   | C  | G  | Upstream-gene | - | - | 0.174 | 486 | Yes | Yes |
| 165 | 42528392 | rs1080984   | A  | G  | Upstream-gene | - | - | 1.42  | 1   | Yes | Yes |
| 166 | 42528477 | rs775251692 | C  | T  | Upstream-gene | - | - | 5.077 | 3   | No  | No  |
| 167 | 42528538 | rs58188898  | G  | A  | Upstream-gene | - | - | 10.95 | 3   | No  | No  |
| 168 | 42528568 | rs1080983   | T  | C  | Upstream-gene | - | - | 0.709 | 414 | No  | Yes |
| 169 | 42528682 | rs551293469 | G  | A  | Upstream-gene | - | - | 4.149 | 4   | No  | No  |
| 170 | 42528851 | rs28680494  | A  | C  | Upstream-gene | - | - | 1.804 | 260 | No  | Yes |
| 171 | 42528858 | rs28439297  | C  | T  | Upstream-gene | - | - | 3.928 | 260 | No  | Yes |
| 172 | 42528976 | rs28360521  | C  | T  | Upstream-gene | - | - | 2.547 | 146 | No  | No  |
| 173 | 42529156 | rs73887946  | C  | T  | Upstream-gene | - | - | 14.44 | 1   | No  | No  |
| 174 | 42529176 | rs138419008 | T  | C  | Upstream-gene | - | - | 12.69 | 2   | No  | No  |
| 175 | 42529219 | rs28568508  | A  | G  | Upstream-gene | - | - | 4.072 | 148 | No  | No  |
| 176 | 42529253 | -           | T  | A  | Upstream-gene | - | - | 4.734 | 1   | No  | No  |
| 177 | 42529321 | rs28566059  | C  | T  | Upstream-gene | - | - | 6.32  | 104 | No  | No  |
| 178 | 42529366 | rs118017929 | C  | G  | Upstream-gene | - | - | 6.933 | 5   | No  | No  |
| 179 | 42529407 | rs28542726  | G  | T  | Upstream-gene | - | - | 7.75  | 35  | No  | Yes |
| 180 | 42529540 | rs28369142  | C  | A  | Upstream-gene | - | - | 0.099 | 8   | No  | Yes |

\* Human Genome version 19 was used.

\*\* SeattleSeq Annotation was used to provide functional annotation for the variants.

\*\*\* The region contains variants positioned between -1619 and 4482 of the NG\_008376.3 RefSeq.

\*\*\*\* PharmVar's translation table for Human Genome version 19 was used.

† The haplotype of the allele containing the R474Q change has been determined and designated *CYP2D6\*138.001* by PharmVar.

‡ The haplotype of the allele containing the A449D change has been determined and designated *CYP2D6\*4.028* by PharmVar.

§ The haplotype of the allele containing the R365H change has been determined and designated *CYP2D6\*139.001* by PharmVar.
